# Supplementary material for: PGC-1α isoforms coordinate to balance hepatic metabolism and apoptosis in inflammatory environments
Source: PubMed Central journal article supplement — Mol Metab. 2020 Jan 11;34:72–84. doi: 10.1016/j.molmet.2020.01.004 (PMC7011010; doi:10.1016/j.molmet.2020.01.004), 2020-01-11
Supplement: mmc5.pdf [file mmc5.pdf]

**Supplementary Table 1: Antibodies and Dilutions (Target, company, catalog number, dilution)**

| <b>Target</b>               | <b>Company</b> | <b>Catalog Number</b> | <b>Dilution</b> |
|-----------------------------|----------------|-----------------------|-----------------|
| PGC-1 $\alpha$              | Millipore      | ST1202                | 1:500           |
| V5                          | Invitrogen     | 46-0705               | 1:1000          |
| TOMM20                      | Sigma          | HPA011562             | 1:2000          |
| HSP90                       | Cell Signaling | 4874                  | 1:2000          |
| Cleaved Caspase 3 (Asp175)  | Cell Signaling | 9661                  | 1:500           |
| Cleaved Caspase 7 (Asp 198) | Cell signaling | 9491                  | 1:1000          |
| Cleaved PARP (Asp 214)      | Cell signaling | 9541                  | 1:500           |
| Lamin B1                    | BioVision      | 3807                  | 1:200           |
| $\beta$ -actin              | Sigma          | A5441                 | 1:5000          |

| <b>Supplementary Table 2: Primers used for conventional PCR (listed in 5' – 3' direction)</b> |                                                            |                                                                |                                                     |
|-----------------------------------------------------------------------------------------------|------------------------------------------------------------|----------------------------------------------------------------|-----------------------------------------------------|
| Gene                                                                                          | Forward Primer                                             | Reverse Primer                                                 | Band size                                           |
| <b>Mouse Primers</b>                                                                          |                                                            |                                                                |                                                     |
| <i>PGC-1α1</i>                                                                                | GACATGTGCAGCCAAGACTC                                       | CTCAAATGGGGAACCCTTGG                                           | 816                                                 |
| <i>PGC-1α2</i> and <i>PGC-1α-b</i>                                                            | GATTGTCATCCATGGATTC                                        | GTTCGCTCAATAGTCTTGTC                                           | 325 / 826                                           |
| <i>PGC-1α3</i> and <i>PGC-1α-c</i>                                                            | CTCAGACCCACTATGCTGCTG                                      | GTTCGCTCAATAGTCTTGTC                                           | 302 / 818                                           |
| <i>PGC-1α4</i>                                                                                | GATTGTCATCCATGGATTC                                        | CTGGAAGATATGGCACAT                                             | 812                                                 |
| <i>NT-PGC-1α-a</i>                                                                            | GACATGTGCAGCCAAGACTC                                       | CTGGAAGATATGGCACAT                                             | 822                                                 |
| <i>NT-PGC-1α-c</i>                                                                            | CTCAGACCCACTATGCTGCTG                                      | CTGGAAGATATGGCACAT                                             | 803                                                 |
| <b>Genotyping primers</b>                                                                     |                                                            |                                                                |                                                     |
| Alb-Cre <sup>Tg</sup>                                                                         | Forward (Albumin promoter)<br>TTAGAGGGGAACAGCTCCAGATGG     | Reverse (Cre-recombinase)<br>GTGAAACAGCATTGCTGTCACTT           |                                                     |
| LSLPGC-1α4                                                                                    | Forward ( <i>Pparg1a</i> exon 6)<br>CCAAACCAACAACCTTTATCTC | Reverse 1 ( <i>Pparg1a</i> intron 7)<br>CCTTCTGATAAAGAGTCAACGC | Reverse 2 ( <i>WPRE</i> )<br>GGAGAAAATGAAAGCCATACGG |
| <i>Pparg1a</i> <sup>fl/fl</sup>                                                               | Forward ( <i>Pparg1a</i> intron 2)<br>GGAGAGGTGTCAGGGAGAG  | Reverse ( <i>Pparg1a</i> intron 2)<br>CACAGCAGAGCACAAAGGA      |                                                     |
| AltProm <sup>fl/fl</sup>                                                                      | Forward<br>AGAGTCAGCAGAACAAGCGT                            | Reverse<br>TGCTTGCAGAGGTGCTCAT                                 |                                                     |

**Supplementary Table 3: Primers used for quantitative real-time PCR (listed in 5' – 3' direction)**

| Gene                                    | Forward Primer                  | Reverse Primer                  |
|-----------------------------------------|---------------------------------|---------------------------------|
| <b>Mouse Primers</b>                    |                                 |                                 |
| <i>Birc2 (Ciap1)</i>                    | TCTGCTGTGGCCTGATGTTGGATA        | ATGGAGACTGCAGACTGGCTGAAA        |
| <i>Birc3 (Ciap2)</i>                    | AACTCCCTTCGGGAAATTGACCCT        | TTCTTTCTCCT GGAGTTTCCGCA        |
| <i>Birc5 (survivin)</i>                 | TGGACAGACAGAGAGCCAAGAACA        | AGCTGCTCAATTGACTGACGGGTA        |
| <i>Ccl5 (Rantes)</i>                    | GCTGCTTTGCCTACCTCTCC            | TCGAGTGACAAACACGACTGC           |
| <i>IkBa (Nfkbia)</i>                    | AGACATCCTTCCGCAAACCTC           | TAGGTCCTTCTGCCATAA              |
| <i>Il-10</i>                            | GCTCTTACTGACTGGCATGAG           | CGCAGCTCTAGGAGCATGTG            |
| <i>Mcp1 (Ccl2)</i>                      | TCACCTGCTGCTACTCATTACCA         | TACAGCTTCTTTGGGACACCTGCT        |
| <i>Naip</i>                             | AGATGAAGAGCTCACACCTGCTT         | AGTTCAGTCAGTCTCATGGCAGCA        |
| <i>Pgc-1α (exon 2 – shared by most)</i> | TGATGTGAATGACTTGGATACAGACA      | GCTCATTGTTGTACTGGTTGGATATG      |
| <i>Pgc-1α (exon 1a)</i>                 | GGACATGTGCAGCCAAGACTCT          | CACTTCAATCCACCCAGAAAGCT         |
| <i>Pgc-1α (exon 1b)</i>                 | CCA GCA GAA TGA GTG ACA TGG A   | G TTCAGGAAGATCTGGGCAAA          |
| <i>Pgc-1α (exon 1b')</i>                | AAGTGAGTAACCGGAGGCATTC          | TTCAGGAAGATCTGGGCAAAGA          |
| <i>Pgc-1β</i>                           | AGTCAGCGGCCTTGTGTCAA            | ACTCTGGGACAGGGCAGCA             |
| <i>Stat1</i>                            | CTG GAG GAG TTG GAA CAG AAA     | CTG AAT GAG CTG CTG GAA GA      |
| <i>Stat3</i>                            | GCCACGTTGGTGTTTCATAATC          | TTCGAAGGTTGTGCTGATAGAG          |
| <i>Irf1</i>                             | GGA AGC TGT GTG GAG ATG TTA G   | TAG CCC TGA GTG GTG TAA CT      |
| <i>Casp2</i>                            | ACC GTT GAG CTG TGA CTA TG      | GTT CCG TAG CAT CTG TGG ATA G   |
| <i>Casp7</i>                            | TCG AGT CCC AGT CTG ATG AT      | CGG CTG AAG TAC AGC TCT TT      |
| <i>Bcl-xl</i>                           | AAG CGT AGA CAA GGA GAT GCA GGT | TCC AAG GCT CTA GGT GGT CAT TCA |
| <i>Tnfa</i>                             | CCCTCACACTCAGATCATCTTCT         | GCTACGACGTGGGCTACAG             |
| <i>Tnfaip3 (A20)</i>                    | AGCCAGAAGAAGCTCAACTGGTGT        | TGCATGCATGAGGCAGTTCCATC         |
| <i>Xiap</i>                             | CCAGCCATGGCAGAATATGA            | TCGCCTTACCTAAAGCATAAA           |
| <i>Nfya</i>                             | CTCTGTGCCTGCTATCCAAA            | CCTCTTAAGGATGCGGTGATAC          |
| <i>Cyclin A</i>                         | CACTGACACCTCTTGACTATCC          | CGTTCACTGGCTTGTCTTCTA           |
| <i>Cyclin B1</i>                        | GGTCGTGAAGTGACTGGAAA            | GTCTCCTGAAGCAGCCTAAAT           |
| <i>Cyclin B2</i>                        | CTCTGCAAGATCGAGGACATAG          | TGCCTGAGGTACTGGTAGAT            |
| <i>Cdk1</i>                             | CAGACTTGAAAGCGAGGAAGA           | TCCTGCAGGCTGACTATATTTG          |
| <i>Cdc25c</i>                           | TGCACAGTCAGAAGGAACTG            | GGAGGAGAATTACAGAGGAAC           |

|                     |                                 |                                 |
|---------------------|---------------------------------|---------------------------------|
| <i>Atad3a</i>       | GACAGGACAGCACAGTAGTAAG          | AGCAGACCATCTCGTCAATG            |
| <i>Pim1</i>         | TTCAGGCAAACGGTCTCTTC            | CCACGGATGGTTCTGGATTT            |
| <i>Csnk2a2</i>      | CACATAGACCTAGATCCACACTTC        | CAAGGTGCCTGTTCTCACTAT           |
| <i>Btg2</i>         | CGCACTGACCGATCATTACAA           | GGGTCCATCTTGTGGTTGATAC          |
| <i>Myc</i>          | CTC CGT ACA GCC CTA TTT CAT C   | TGG GAA GCA GCT CGA ATT T       |
| <i>Cdkn2a (p16)</i> | CAT GTT GTT GAG GCT AGA GAG G   | CAC CGT AGT TGA GCA GAA GAG     |
| <i>Tnfrsf17</i>     | GCCTGGAGTATACAGTGGAAGA          | CGGGAAGAAATGGTCAGAATCC          |
| <i>Nip3</i>         | GACGAAGTAGCTCCAAGAGTTC          | CCAAAGCTGTGGCTGTCTAT            |
| <i>Nfil3</i>        | GGTTTCCGAAGCTGAGAATTTG          | AGATCGGTTGTGTGGCTATG            |
| <i>Casp3</i>        | AGTGGGACTGATGAGGAGAT            | GTAACCAGGTGCTGTAGAGTAAG         |
| <i>Sp4</i>          | TTTCTCAGCCAGCTTCTAGTTC          | GGGTGGAAGGATTACCTGATTT          |
| <i>Bcl2</i>         | GGAGGATTGTGGCCTTCTTT            | G TTCAGG TACTCAGTCATCCAC        |
| <i>RelA (p65)</i>   | GAGAAGCACAGATACCACCAAG          | GAGATT CGAACTGTTCTCTGGTC        |
| <i>Fas</i>          | CCAAGTGCAAGTGCAAACCAGACT        | AGGATGGTCAACAACCATAGGCGA        |
| <i>Cyto c</i>       | GCAAGCATAAGACTGGACCAAA          | TGTTGGCATCTGTGTAAGAGAATC        |
| <i>AtpsynF1</i>     | CCAGGGTCAACAGACGTGTCAG          | TCTCCATGCCTCTAACACTCG           |
| <i>Cox5b</i>        | ATGCTACCTCCAAAGGCAGCTTC         | TGCAGCCC ACTATTCTCTTGTGTC       |
| <i>Cox4i</i>        | AGTTTAACGAGAGCTTCGCCGAGA        | AGCGCAGTGAAGCCAATGAAGAAC        |
| <i>Pepck</i>        | CAGGATCGAAAGCAAGACAGT           | AAGTCCTCTTCCGACATCCAG           |
| <i>G6Pase</i>       | CAGGCATTGCTGTGGCTGAACTT         | TAGCAGGTAGAATCCAAGCGCGAA        |
| <i>Pdhea</i>        | CCT TTC CCT TTA GCA CAA CCT C   | GCT GGC ATA AAC CCT ACG GAC     |
| <i>Idh3a</i>        | CTG GTG GTG TTC AGA CAG TAA C   | CTC CCA CTG AAT AGG TGC TTT G   |
| <i>Cs</i>           | CAAGCAGCAACATGGGAAGA            | GTC AGG ATC AAG AAC CGA AGT CT  |
| <i>Aco2</i>         | GTT GGA CCT CAC CCA AAG AT      | GGT CCG TGG TAT TCC ACA ATA G   |
| <i>Scad</i>         | ACC AAA GCT TGG ATC ACC AAC TCC | AACCAGGAAGGCACTGATACCCTT        |
| <i>Lcad</i>         | CTT GCT TGG CAT CAA CAT CGC AGA | ATT GGA GTA CGC TTG CTC TTC CCA |
| <i>Vlcad</i>        | GGC CAA GCT GGT GAA ACA CAA GAA | ACAGAACCACCACCATGGCATAGA        |
| <i>Mcad</i>         | AACACTTACTATGCCTCGATTGCA        | CCATAGCCTCCGAAAATCTGAA          |
| <i>Cpt1a</i>        | GAACCCCAACATCCCCAAAC            | TCCTGGCATTCTCCTGGAAT            |

**Supplementary Table 4: Enriched Transcription Factor Motifs from iRegulon****Genes unique to PGC-1 $\alpha$ 1 (set of 2571 genes)**

| <b>Transcription Factor</b> | <b>NES</b> | <b>#Targets</b> | <b>#Motifs/Tracks</b> |
|-----------------------------|------------|-----------------|-----------------------|
| Etv6                        | 3.93       | 1439            | 64                    |
| Mef2c                       | 3.625      | 295             | 3                     |
| Jun                         | 3.554      | 299             | 7                     |
|                             |            |                 |                       |

**Genes unique to PGC-1 $\alpha$ 4 (set of 1208 genes)**

| <b>Transcription Factor</b> | <b>NES</b> | <b>#Targets</b> | <b>#Motifs/Tracks</b> |
|-----------------------------|------------|-----------------|-----------------------|
| Sp4                         | 5.877      | 515             | 10                    |
| Nfyc                        | 5.151      | 206             | 9                     |
| Irf6                        | 4.96       | 295             | 13                    |
| Nfya                        | 4.333      | 453             | 6                     |
| Gm7148                      | 4.25       | 363             | 3                     |
| Pitx2                       | 4.014      | 330             | 4                     |
| Irf4                        | 3.951      | 118             | 2                     |
| Hsf4                        | 3.932      | 336             | 4                     |
| Rela                        | 3.588      | 93              | 4                     |
| Atf4                        | 3.48       | 136             | 3                     |
| Srf                         | 3.433      | 63              | 1                     |
| Tbx5                        | 3.233      | 88              | 1                     |
| Ebf1                        | 3.217      | 41              | 1                     |
|                             |            |                 |                       |

**Genes shared by PGC-1 $\alpha$ 1 and PGC-1 $\alpha$ 4 (set of 2166 genes)**

| <b>Transcription Factor</b> | <b>NES</b> | <b>#Targets</b> | <b>#Motifs/Tracks</b> |
|-----------------------------|------------|-----------------|-----------------------|
| Irf4                        | 5.143      | 996             | 83                    |
| Elk4                        | 5.109      | 990             | 24                    |
| Nr1h2                       | 3.992      | 412             | 4                     |
| Atf3                        | 3.967      | 67              | 2                     |
| Zbtb33                      | 3.731      | 577             | 3                     |
| Zfp143                      | 3.52       | 239             | 2                     |
| Pitx2                       | 3.275      | 322             | 1                     |
| Irf1                        | 3.002      | 52              | 1                     |
|                             |            |                 |                       |

**Genes shared by PGC-1 $\alpha$ 1 and PGC-1 $\alpha$ 4, opposing regulation (set of 175 genes)**

| <b>Transcription Factor</b> | <b>NES</b> | <b>#Targets</b> | <b>#Motifs/Tracks</b> |
|-----------------------------|------------|-----------------|-----------------------|
| Spib                        | 5.472      | 40              | 4                     |
| Nfate2                      | 4.794      | 30              | 3                     |
| Klf4                        | 4.716      | 23              | 7                     |
| Srf                         | 4.423      | 31              | 7                     |
| Yeats4                      | 4.131      | 15              | 2                     |
| Mef2a                       | 4.115      | 26              | 3                     |
| Tead1                       | 4.077      | 18              | 8                     |
| Prkaa2                      | 3.652      | 25              | 2                     |
| Srebf2                      | 3.331      | 15              | 3                     |
| Jund                        | 3.293      | 14              | 1                     |
| Fezf2                       | 3.223      | 7               | 1                     |
